# Supplementary material for: Development of a Conceptual Framework of Patient-reported Outcomes in Light Chain Amyloidosis: A Qualitative Study
Source: Research Square preprint supplement (doi:10.21203/rs.3.rs-272559/v1), 2021-03-01

Supplementary data

**Summary statistics for AL PROfile Fatigue**

| **Facet** | **Total References** | **Interviews Facet Occurred** |
| --- | --- | --- |
| Fatigue Frequency | 3 | 3 |
| Fatigue Duration | 19 | 13 |
| Fatigue Intensity | 68 | 18 |
| Impact on Physical Activities | 51 | 17 |
| Impact on Mental Activities | 5 | 3 |
| Impact on Social Activities | 14 | 9 |

**
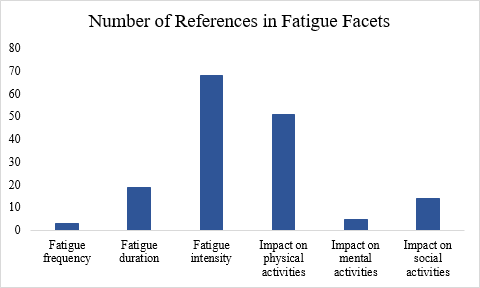
**

Summary statistics for AL PROfile Physical Function

| **Facet** | **Total References** | **Interviews Facet Occurred** |
| --- | --- | --- |
| Mobility (lower extremity) | 78 | 18 |
| Upper extremity | 16 | 9 |
| Axial or central (neck and back function) | 7 | 5 |
| Complex activities | 23 | 10 |
| Daily living tasks | 65 | 19 |


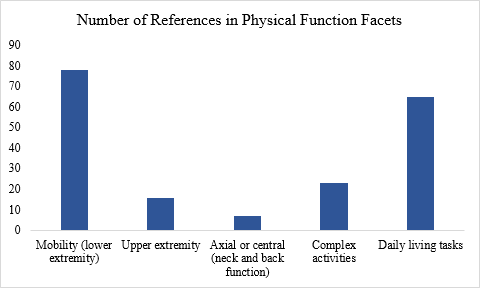

Supplement: Supplementary file 1 [file 0cd6a8bcdc7f5e80f2f75f4f.docx]
